# Supplementary material for: Comprehensive Analysis of GH3 Gene Family in Potato and Functional Characterization of StGH3.3 under Drought Stress
Source: MDPI journal article supplement (doi:10.3390/ijms242015122), 2023-10-12
Supplement: s1 [file s1]

**Table S1** The sequences of primers were used for *StGH3s* in qRT-PCR

| Gene            | Sequences                                                              |
|-----------------|------------------------------------------------------------------------|
| <i>StGH3.2</i>  | F: 5'-TGTACGCAGCTTCCGAGTGTTAC-3'<br>R: 5'-GGTCAACGAGATTGGTAGGTGAGG-3'  |
| <i>StGH3.3</i>  | F: 5'-TGACTCAACCAATCCTCGTGACTC-3'<br>R: 5'-GTGAAACCCCGTGACCTGGAG-3'    |
| <i>StGH3.6</i>  | F: 5'-TCAGTACAAAGCTCCACGGTGTG-3'<br>R: 5'-ACCATTGCTTCTGACCTGGAACC-3'   |
| <i>StGH3.7</i>  | F: 5'-CCTCTGCTCTCAACCCATCTCTG-3'<br>R: 5'-TCCTCCTCAATCGTTGGCATCAG-3'   |
| <i>StGH3.11</i> | F: 5'-AGTTGTGGAAGGAATTGTGCCATG-3'<br>R: 5'-TCTTGATGCCAGCTCTGGATTAGG-3' |
| <i>StGH3.19</i> | F: 5'-AAGTCGTGCCTGTCATCACCTAC-3'<br>R: 5'-TACGGGCTGGGAGCATAGGATAG-3'   |
| <i>Actin</i>    | F: 5'-AGGAGCATCCTGTCCTCCTAA-3'<br>R: 5'-CACCATCACCAGAGTCCAACA-3'       |
